# Supplementary material for: Dynamics of HIV Latency and Reactivation in a Primary CD4+ T Cell Model
Source: PubMed Central journal article supplement (PMC4038609; doi:10.1371/journal.ppat.1004156), 2014-05-29

## Infection process:

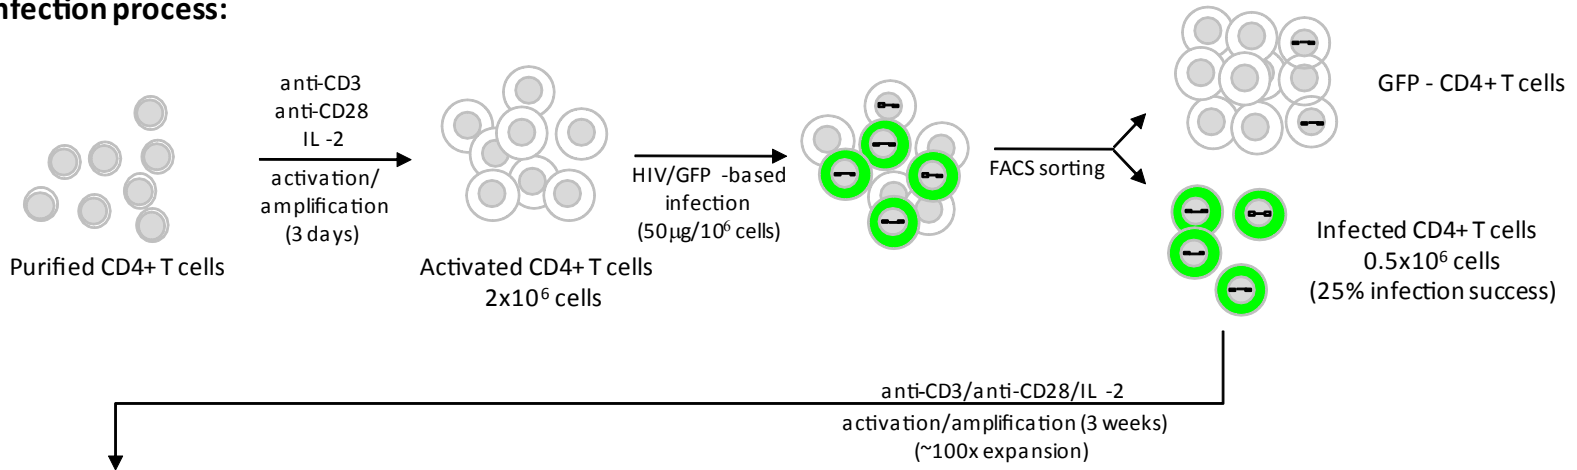

## Latency process:

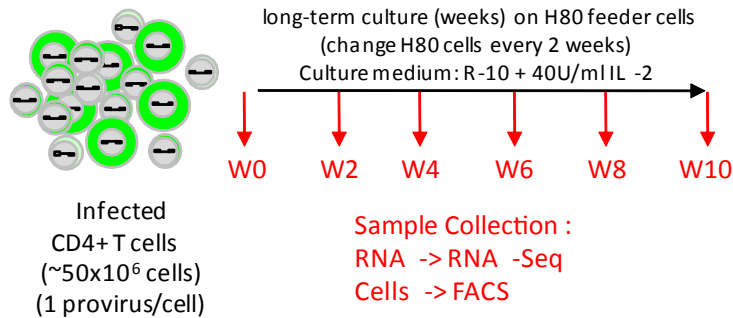

## Reactivation process:

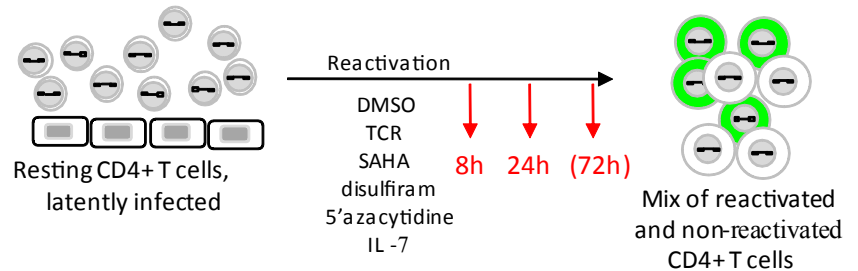

Supplement: ppat.1004156.s001.pdf [file ppat.1004156.s001.pdf]
