# Supplementary material for: Dynamics of HIV Latency and Reactivation in a Primary CD4+ T Cell Model
Source: PubMed Central journal article supplement (PMC4038609; doi:10.1371/journal.ppat.1004156), 2014-05-29
Supplement: ppat.1004156.s009.pdf [file ppat.1004156.s009.pdf]

| SHCS ID | Current |      |                     | History           |                   |                     |                                   | Date of HIV diagnosis | Gender | Age | Sample ID (Fig.S8) |
|---------|---------|------|---------------------|-------------------|-------------------|---------------------|-----------------------------------|-----------------------|--------|-----|--------------------|
|         | Viremia | CD4  | Treatment           | MONTHS <50 copies | Nb of blips 20-49 | Nb of Blips(50-400) | Baseline viremia before treatment |                       |        |     |                    |
| 52193   | <20     | 591  | TDF,FTC,ATV,RTV     | 75                | 4                 | 1                   | 5590                              | 06.08.2007            | F      | 41  | S1                 |
| 51464   | <20     | 588  | 3TC,ETV,RAL         | 76                | 1                 | 0                   | 249000                            | 23.101996             | M      | 69  | S2                 |
| 52353   | <20     | 843  | TDF,FTC,RAL         | 41                | 0                 | 0                   | 136000                            | 05.02.2010            | M      | 56  | S3                 |
| 52227   | <20     | 1369 | ABC,3TC,ETV         | 61                | 0                 | 0                   | 3760000                           | 15.05.2008            | M      | 41  | S4                 |
| 50080   | <20     | 324  | TDF,FTC,DRV,RTV,ETV | 75                | 3                 | 0                   | 159000                            | 01.06.1986            | M      | 56  | P1                 |
| 52410   | 30      | 644  | TDF,FTC,EFV         | 21                | 1                 | 0                   | 47900                             | 18.03.2011            | M      | 42  | P1                 |
| 52447   | <20     | 507  | TDF,FTC,DRV,RTV,MVC | 24                | 2                 | 0                   | 582000                            | 01.07.2003            | F      | 37  | P2                 |
| 51736   | <20     | 463  | TDF,FTC,ATV,RTV     | 86                | 2                 | 2                   | 312000                            | 15.10.1995            | M      | 59  | P2                 |
| 52284   | <20     | 595  | TDF,FTC,RAL         | 55                | 0                 | 0                   | 121000                            | 11.03.2009            | M      | 43  | P2                 |
| 52378   | <20     | 834  | TDF,FTC,ATV,RTV     | 35                | 0                 | 0                   | 5250000                           | 02.08.2010            | M      | 34  | P2                 |
| 51555   | <20     | 667  | ABC,3TC,DRV,RTV,MVC | 39                | 6                 | 1                   | 32700                             | 07.10.1997            | M      | 58  | P3                 |
| 52478   | <20     | 761  | TDF,FTC,ATV,RTV     | 13                | 0                 | 0                   | 230000                            | 15.05.2009            | M      | 43  | P3                 |
| 52160   | <20     | 1193 | ABC,3TC,ETV         | 62                | 3                 | 1                   | 93700                             | 25.10.2006            | M      | 45  | S5                 |
| 52365   | <20     | 650  | TDF,FTC,EFV         | 36                | 2                 | 0                   | 123000                            | 08.02.2006            | M      | 41  | P4                 |
| 52368   | <20     | 853  | ABC,3TC,ETV         | 50                | 0                 | 1                   | 196000                            | 15.03.2003            | M      | 46  | P4                 |
| 51554   | <20     | 942  | TDF,FTC,DRV,RTV,ETV | 72                | 0                 | 1                   | 74000                             | 09.09.1997            | M      | 40  | S6                 |
| 51579   | <20     | 925  | TDF,FTC,NVP         | 173               | 2                 | 5                   | 504878                            | 26.01.1998            | F      | 47  | P5                 |
| 51612   | <20     | 804  | TDF,FTC,EFV         | 21                | 0                 | 0                   | 68800                             | 15.12.1997            | M      | 42  | P5                 |
| 52241   | <20     | 240  | ABC,3TC,DRV,RTV     | 55                | 0                 | 0                   | 140000                            | 20.05.2008            | F      | 36  | P5                 |
